# Supplementary material for: Ghrelin action in the brain controls adipocyte metabolism
Source: JCI journal article supplement (doi:10.1172/jci25811), 2006-06-08
Supplement: sd1 [file 1]

**Supplement Table 1.** Effects of intracerebroventricular ghrelin infusion (2.5 nmol/d) on glucose utilization indices of individual muscles during euglycemic hyperinsulinemic clamps.

|                       | QR<br>(ng/min x mg) | QB<br>(ng/min x mg) | GR<br>(ng/min x mg) | GB<br>(ng/min x mg) | EDL<br>(ng/min x mg) | Tibialis<br>(ng/min x mg) | Heart<br>(ng/min x mg) |
|-----------------------|---------------------|---------------------|---------------------|---------------------|----------------------|---------------------------|------------------------|
| <b>Controls</b>       | 14.5 ± 1.7          | 8.7 ± 0.9           | 17.9 ± 4.9          | 6.6 ± 1.0           | 11.4 ± 0.9           | 11.9 ± 1.6                | 16.3 ± 2.7             |
| <b>Ghrelin-ad lib</b> | 15.5 ± 1.0          | 8.3 ± 1.0           | 12.3 ± 1.1          | 5.4 ± 0.7           | 10.4 ± 1.4           | 11.5 ± 1.3                | 24.0 ± 3.6             |
| <b>Ghrelin-pf</b>     | 22.4 ± 2.0 * #      | 11.3 ± 1.5          | 18.9 ± 2.5          | 8.7 ± 1.5           | 14.5 ± 1.1           | 15.2 ± 2.1                | 26.1 ± 3.6             |

Values are means ± SEM of 6-7 animals per group. Rats were icv infused with either ghrelin for 6 days or isotonic saline (controls). Ghrelin-pf (pair-fed) animals were fed the same amount of food as that consumed by controls. QR: red quadriceps; QB: white quadriceps; GR: red gastrocnemius; GB: white gastrocnemius; EDL: extensor digitorum longus. Statistical significance: \*, p at least <0.05 versus controls and #, p at least <0.05 versus ghrelin-ad lib; otherwise, NS.

**Supplement Table 2** Effects of intracerebroventricular ghrelin infusion (2.5 nmol/d) on mRNA expression of acetyl CoA carboxylase-a (ACC), fatty acid synthase (FAS), lipoprotein lipase (LPL) and carnitine palmitoyl transferase 1a (CPT-1a) in epididymal white adipose tissue of *ad libitum* fed animals as measured using low density microarray.

|                       | <b>ACC</b><br>(% of controls) | <b>FAS</b><br>(% of controls) | <b>LPL</b><br>(% of controls) | <b>CPT-1a</b><br>(% of controls) |
|-----------------------|-------------------------------|-------------------------------|-------------------------------|----------------------------------|
| <b>Controls</b>       | 100 ± 40                      | 100 ± 58                      | 100 ± 10                      | 100 ± 9                          |
| <b>Ghrelin-ad lib</b> | 429 ± 38*                     | 388 ± 50*                     | 136 ± 10*                     | 61 ± 8*                          |

Values are means ± SEM of 6-7 animals per group. Rats were icv infused with either ghrelin for 6 days or isotonic saline (controls). Ghrelin-infused animals were fed *ad libitum*. Statistical significance: \*, p at least < 0.05 versus controls.

**Supplement Table 3.** Effects of intracerebroventricular ghrelin infusion (250 pmol/d) on food intake, body weight, mRNA expression of hypothalamic neuropeptide Y (NPY), of epididymal white adipose tissue acetyl CoA carboxylase-a (ACC) and fatty acid synthase (FAS), and of brown adipose tissue uncoupling protein-1 (UCP1) and uncoupling protein-3 (UCP3).

|                       | <b>F.I<br/>(g)</b> | <b>B.W<br/>(g)</b> | <b>NPY<br/>(% of controls)</b> | <b>ACC<br/>(% of controls)</b> | <b>FAS<br/>(% of controls)</b> | <b>UCP1<br/>(% of controls)</b> | <b>UCP3<br/>(% of controls)</b> |
|-----------------------|--------------------|--------------------|--------------------------------|--------------------------------|--------------------------------|---------------------------------|---------------------------------|
| <b>Controls</b>       | 105 ± 3            | 16.6 ± 1           | 100 ± 16.8                     | 100 ± 21                       | 100 ± 25                       | 100 ± 15                        | 100 ± 23                        |
| <b>Ghrelin-ad lib</b> | 98 ± 2             | 11.6 ± 3           | 79.1 ± 9.5                     | 102 ± 33                       | 99 ± 36                        | 83 ± 8                          | 74 ± 11                         |
| <b>Ghrelin-pf</b>     | 104 ± 3            | 14.1 ± 1.8         | 95.4 ± 16.5                    | 167 ± 42                       | 141 ± 32                       | 76 ± 31                         | 47 ± 13                         |

Values are means ± SEM of 6-7 animals per group. Rats were icv infused with either ghrelin for 6 days (measurement of food intake and body weight performed at day 4) or isotonic saline (controls). Ghrelin-pf (pair-fed) animals were fed the same amount of food as that consumed by controls. Statistical significance: NS.
